# Supplementary material for: Factors Determining the Functional State of Cardiac Surgery Patients with Complicated Postoperative Period
Source: MDPI journal article supplement (doi:10.3390/ijerph19074329), 2022-04-04
Supplement: s1 [file s1]

Suppl. Table S1. Multiple linear regression (Forward) in assessing the distance 6MWT at discharge with perioperative indicators in patients with complications after cardiac surgery (all patients; Model Summary)

| Adjusted R Square | Std. Error of the Estimate |
|-------------------|----------------------------|
| ,392              | 64,27934                   |
| ,514              | 57,47331                   |
| ,671              | 47,31268                   |
| ,733              | 42,60734                   |

a. Predictors: (Constant), 6MWT after ICU

b. Predictors: (Constant), 6MWT after ICU, Cardiopulmonary bypass duration

c. Predictors: (Constant), 6MWT after ICU, Cardiopulmonary bypass duration, Body mass index

d. Predictors: (Constant), 6MWT after ICU, Cardiopulmonary bypass duration, Body mass index, Left foot extensor strength

*6MWT – six minute walk test; ICU - Intensive Care Unit*

Suppl. Table S2. Multiple linear regression (Forward) in assessing the distance 6MWT at discharge with perioperative indicators in patients with complications after cardiac surgery (patients with NMES; Model Summary)

| Model | R                 | R Square | Adjusted R Square | Std. Error of the Estimate |
|-------|-------------------|----------|-------------------|----------------------------|
| 1     | ,738 <sup>a</sup> | ,545     | ,504              | 58,96005                   |
| 2     | ,845 <sup>b</sup> | ,714     | ,657              | 49,03027                   |

a. Predictors: (Constant), age

b. Predictors: (Constant), age, Cardiopulmonary bypass duration

Suppl. Table S3. Multiple linear regression (Forward) in assessing the distance 6MWT at discharge with perioperative indicators in patients with complications after cardiac surgery (patients without NMES; Model Summary)

| Model | R                 | R Square | Adjusted R Square | Std. Error of the Estimate |
|-------|-------------------|----------|-------------------|----------------------------|
| 1     | ,756 <sup>a</sup> | ,572     | ,536              | 53,64813                   |
| 2     | ,889 <sup>b</sup> | ,790     | ,752              | 39,25813                   |
| 3     | ,928 <sup>c</sup> | ,862     | ,820              | 33,40927                   |

a. Predictors: (Constant), Body mass index

b. Predictors: (Constant), Body mass index, 6MWT after ICU

c. Predictors: (Constant), Body mass index, 6MWT after ICU, Left foot extensor strength
